# Supplementary material for: Factors Associated with COVID-19 Vaccine Booster Hesitancy: a Retrospective Cohort Study, Fukushima Vaccination Community Survey
Source: Preprints.org preprint supplement (doi:10.20944/preprints202202.0333.v1), 2022-02-25
Supplement: Supplementary file 1 [file supplementary]

**Supplementary Table 1.** A logistic regression to identify variables associated with vaccine avoidance

|  | B (se) | OR (95% CI) | p-value |
| --- | --- | --- | --- |
| Age | -0.200 | 0.98 (0.96–1.00) | 0.034 |
| Sex (base: male) | 0.117 | 1.12 (0.63–2.01) | 0.70 |
| **Adverse reaction at 2nd dose** |  |  |  |
| 37.5℃ fever | -0.032 | 0.97 (0.49–1.91) | 0.93 |
| fatigue | -0.486 | 0.62 (0.32–1.18) | 0.142 |
| headache | 0.267 | 1.31 (0.66–2.59) | 0.45 |
| joint pain | -0.163 | 0.85 (0.45–1.61) | 0.62 |
| nausea | 1.423 | 4.15 (1.82–9.47) | 0.001 |
| IgG antibody titer | 0.958 | 2.61 (1.31–5.18) | 0.006 |
